# Supplementary material for: Identifying Modules of Coexpressed Transcript Units and Their Organization of Saccharopolyspora erythraea from Time Series Gene Expression Profiles
Source: PubMed Central journal article supplement (PMC2920828; doi:10.1371/journal.pone.0012126), 2010-08-12

### Scale independence

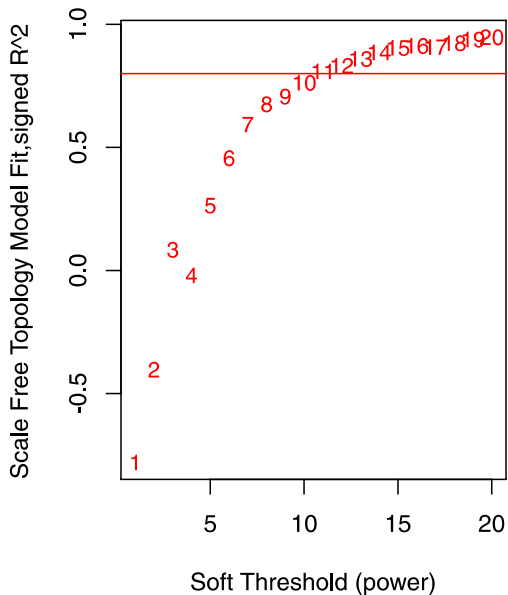

### Mean connectivity

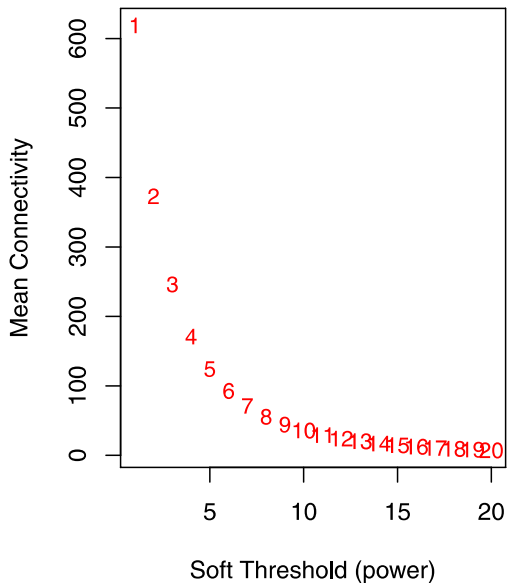

Supplement: pone.0012126.s002.pdf [file pone.0012126.s002.pdf]
